# Supplementary material for: SR proteins are NXF1 adaptors that link alternative RNA processing to mRNA export
Source: PubMed Central journal article supplement (PMC4782049; doi:10.1101/gad.276477.115), 2016-03-01

**A**

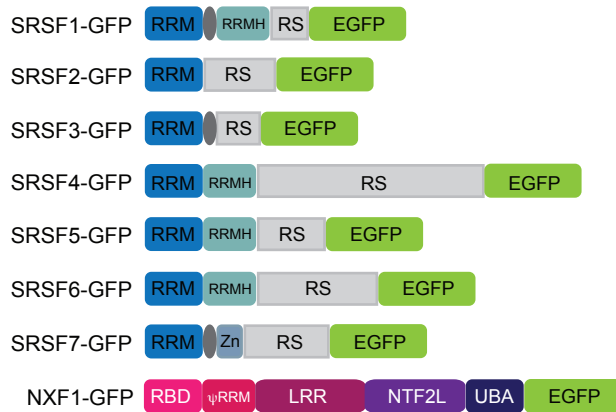

**B**

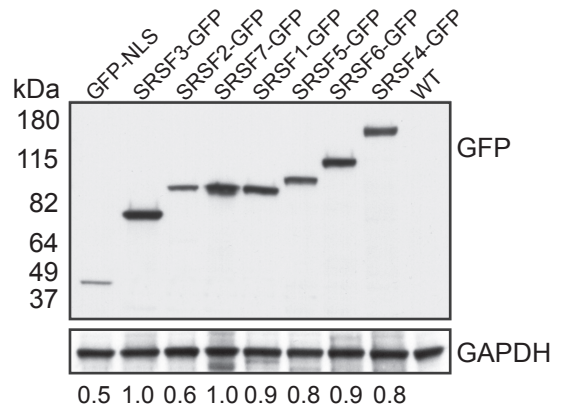

**C**

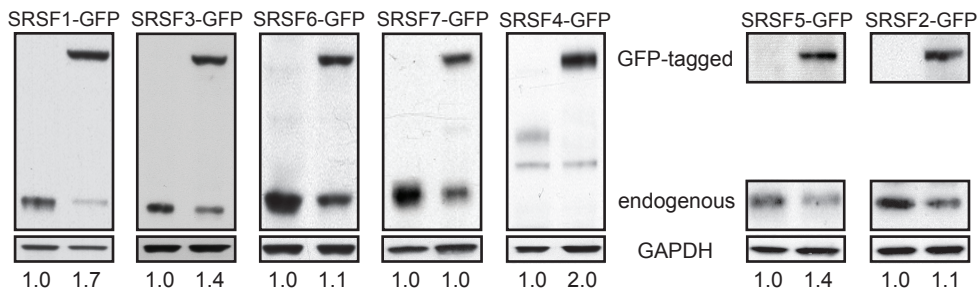

**D**

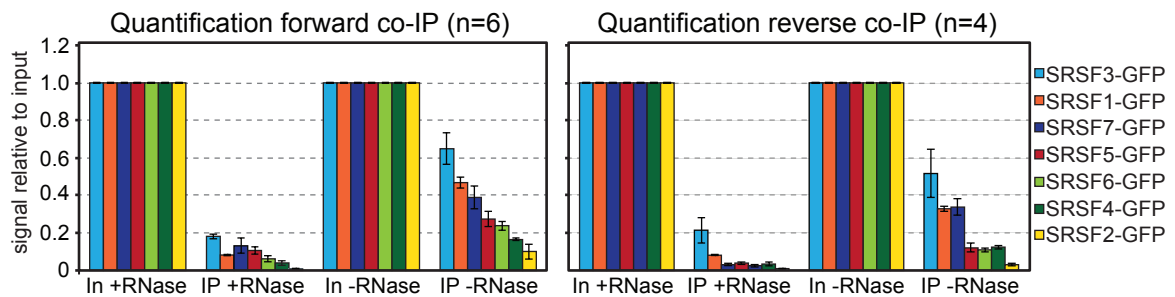

**E**

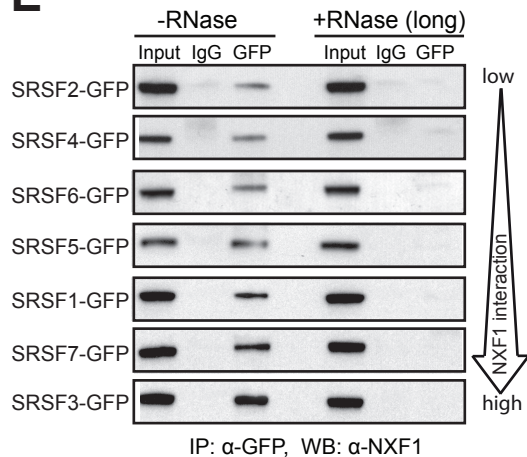

**F**

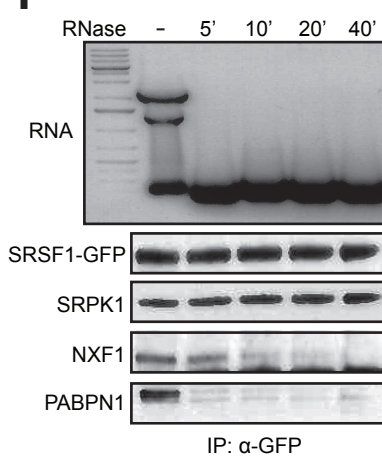

**G**

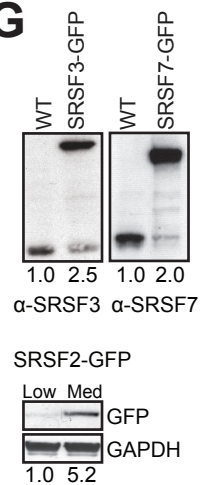

Supplement: supp_30.5.553_SuppFigS2.pdf [file supp_30.5.553_SuppFigS2.pdf]
