# Supplementary material for: SR proteins are NXF1 adaptors that link alternative RNA processing to mRNA export
Source: PubMed Central journal article supplement (PMC4782049; doi:10.1101/gad.276477.115), 2016-03-01

**A**

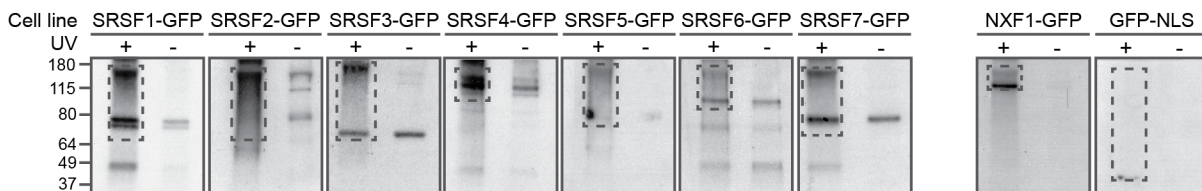

**B**

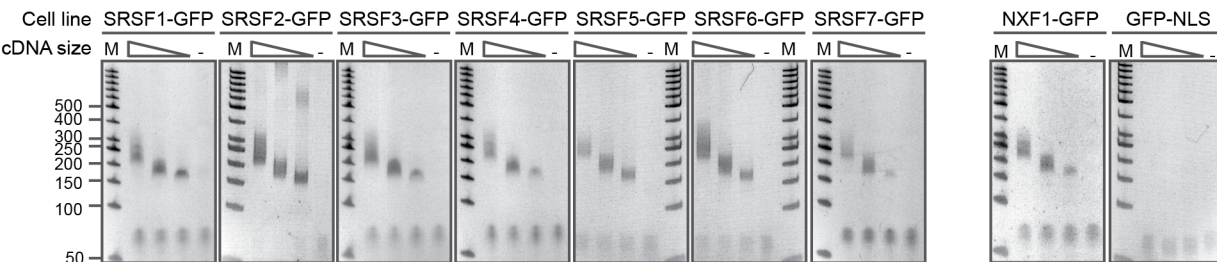

**C**

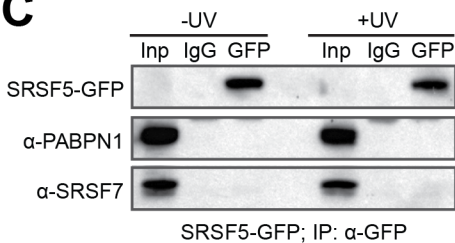

**D**

| Protein | Exons | Genes | PC (%) | Intron-cont. | Intron-less ncRNAs (%) |       |
|---------|-------|-------|--------|--------------|------------------------|-------|
| SRSF1   | 42209 | 8656  | 89.74  | 7632         | 136                    | 10.26 |
| SRSF2   | 51317 | 9178  | 92.31  | 8382         | 90                     | 7.69  |
| SRSF3   | 43613 | 9142  | 92.47  | 8324         | 130                    | 7.53  |
| SRSF4   | 49436 | 8412  | 90.28  | 7458         | 136                    | 9.72  |
| SRSF5   | 42256 | 8915  | 90.56  | 7978         | 95                     | 9.44  |
| SRSF6   | 53939 | 9199  | 91.19  | 8254         | 135                    | 8.81  |
| SRSF7   | 48253 | 8840  | 91.05  | 7906         | 143                    | 8.95  |
| NXF1    | 48253 | 5781  | 85.19  | 4814         | 111                    | 14.81 |

**E**

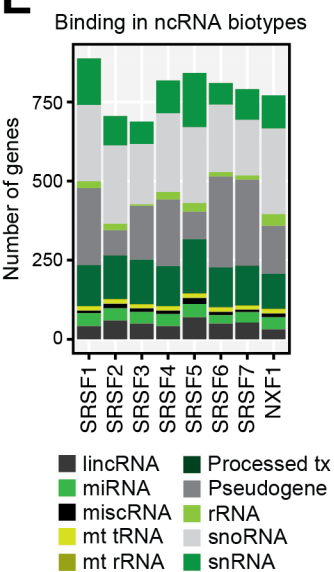

**F**

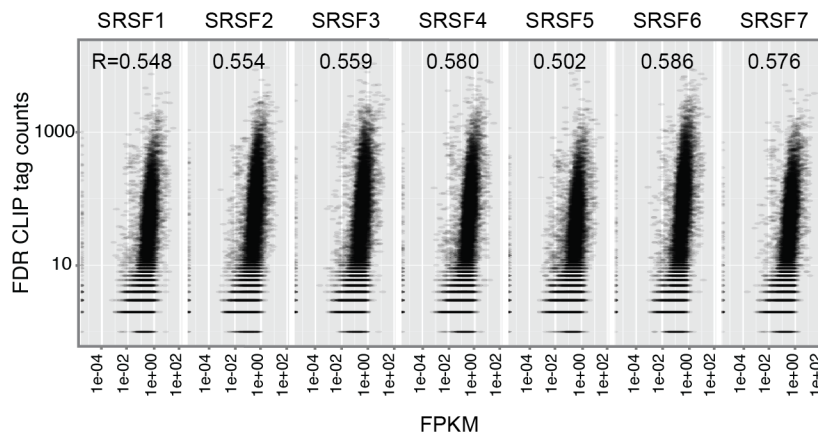

Supplement: supp_30.5.553_SuppFigS3.pdf [file supp_30.5.553_SuppFigS3.pdf]
