# Supplementary material for: SR proteins are NXF1 adaptors that link alternative RNA processing to mRNA export
Source: PubMed Central journal article supplement (PMC4782049; doi:10.1101/gad.276477.115), 2016-03-01
Supplement: supp_30.5.553_SuppFigS5.pdf [file supp_30.5.553_SuppFigS5.pdf]

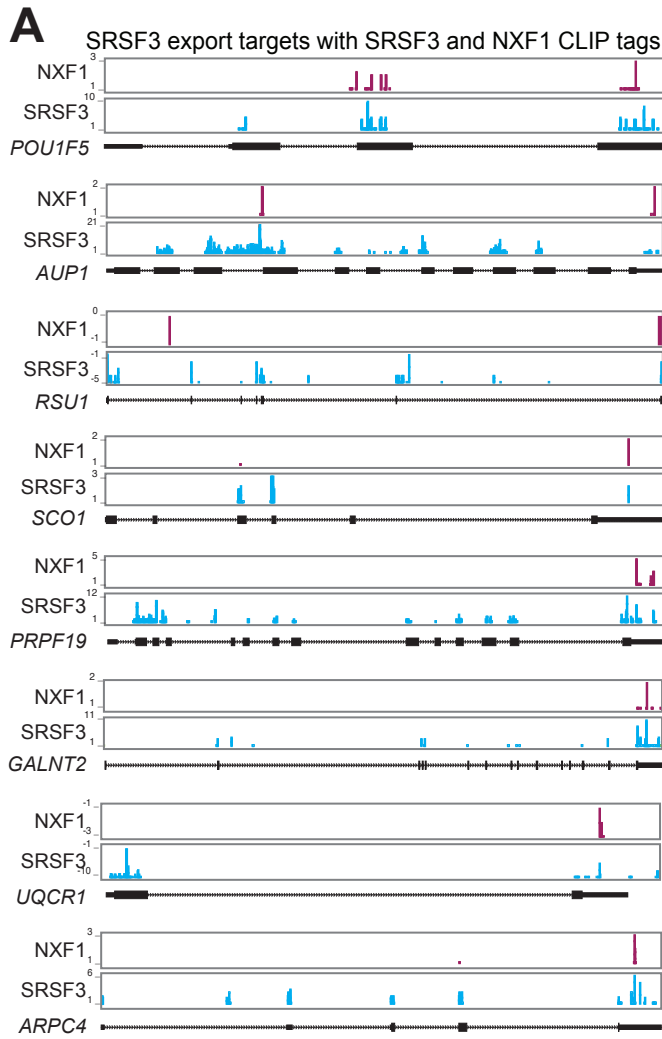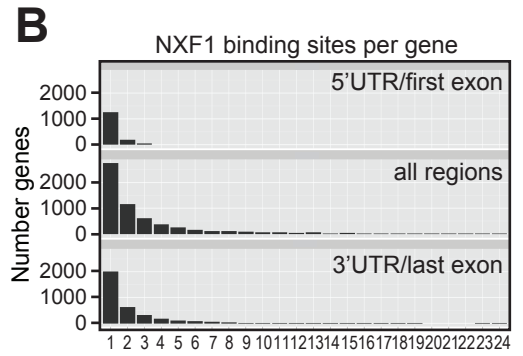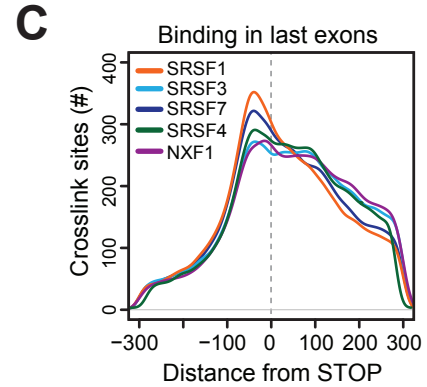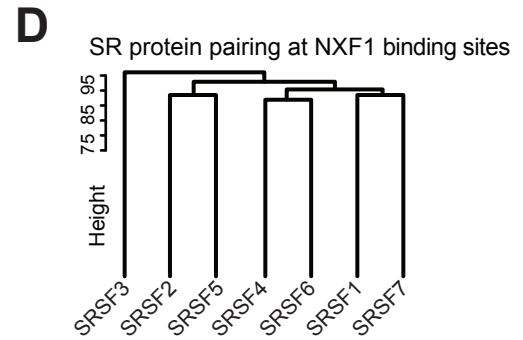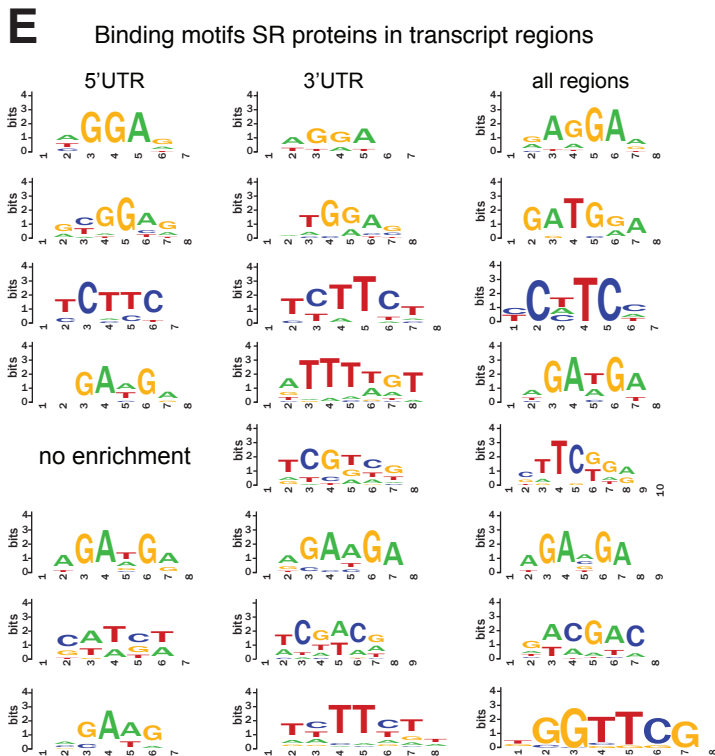

SRSF1  
SRSF2  
SRSF3  
SRSF4  
SRSF5  
SRSF6  
SRSF7  
NXF1
